# Supplementary material for: Lymphedema and Post-Operative Complications after Sentinel Lymph Node Biopsy versus Lymphadenectomy in Endometrial Carcinomas—A Systematic Review and Meta-Analysis
Source: MDPI journal article supplement (doi:10.3390/jcm10010120), 2020-12-31
Supplement: s1 [file s1]

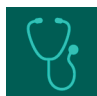

## Supplement Post-operative complications grading systems

**Table S1.** Memorial Sloan Kettering Cancer Center Surgical Secondary Events Grading System, used by Accorsi et al. [24].

|                  |                                                           |
|------------------|-----------------------------------------------------------|
| <b>Grade 0</b>   | No complications                                          |
| <b>Grade I</b>   | Bedside care or oral medications                          |
| <b>Grade II</b>  | Intravenous medications, transfusion                      |
| <b>Grade III</b> | Radiologic, endoscopic or operative intervention required |
| <b>Grade IV</b>  | Chronic disability or organ resection                     |
| <b>Grade V</b>   | Death                                                     |

**Table S2.** Accordion Severity Classification, used by Casarin et al. [37,38].

|                  |                                                                                                                                                                                                                                                                                                                                                             |
|------------------|-------------------------------------------------------------------------------------------------------------------------------------------------------------------------------------------------------------------------------------------------------------------------------------------------------------------------------------------------------------|
| <b>Grade 0</b>   | No complications<br>Complications carrying minor risks. At most requires bedside procedure.                                                                                                                                                                                                                                                                 |
| <b>Grade I</b>   | Allowed therapeutic regimens are: antiemetics, antipyretics, analgesics, diuretics, electrolytes, and physiotherapy. Hospital stay required for treatment of complication does not exceed twice the median length of stay for the procedure                                                                                                                 |
| <b>Grade II</b>  | Potentially life threatening<br>Requiring pharmacological treatment with drugs other than such allowed for grade 1 complications. Blood transfusions and total parenteral nutrition are also included. Any patient with a complication and hospital stay exceeding twice the median length of stay for the procedure and not falling into a higher category |
| <b>Grade IIa</b> |                                                                                                                                                                                                                                                                                                                                                             |
| <b>Grade IIb</b> | Requiring invasive procedures: surgical, endoscopic or radiological (invasive) intervention                                                                                                                                                                                                                                                                 |
| <b>Grade III</b> | Complications with residual or lasting disability. Examples are stroke, organ and limb loss                                                                                                                                                                                                                                                                 |
| <b>Grade IV</b>  | Death in a patient with a complication                                                                                                                                                                                                                                                                                                                      |

**Table S3.** Clavien Dindo Classification, used by Geppert *et al.*, Imboden et al. and Polan et al. [35,39–41].

|                   |                                                                                                                                                                                                                                                                                                                                                                                |
|-------------------|--------------------------------------------------------------------------------------------------------------------------------------------------------------------------------------------------------------------------------------------------------------------------------------------------------------------------------------------------------------------------------|
| <b>Grade 0</b>    | No complications<br>Any deviation from the normal post-operative course without the need for pharmacological treatment or surgical, endoscopic and radiological interventions. Allowed therapeutic regimens are: drugs as antiemetics, antipyretics, analgesics, diuretics and electrolytes and physiotherapy. This grade also includes wound infections opened at the bedside |
| <b>Grade I</b>    |                                                                                                                                                                                                                                                                                                                                                                                |
| <b>Grade II</b>   | Requiring pharmacological treatment with drugs other than such allowed for grade I complications.<br>Blood transfusions and total parenteral nutrition are also included                                                                                                                                                                                                       |
| <b>Grade III</b>  | Requiring surgical, endoscopic or radiological intervention                                                                                                                                                                                                                                                                                                                    |
| <b>Grade IIIa</b> | Intervention not under general anesthesia                                                                                                                                                                                                                                                                                                                                      |
| <b>Grade IIIb</b> | Intervention under general anesthesia                                                                                                                                                                                                                                                                                                                                          |
| <b>Grade IV</b>   | Life-threatening complication (including CNS complications)* requiring IC/ICU-management                                                                                                                                                                                                                                                                                       |
| <b>Grade IVa</b>  | Single organ dysfunction (including dialysis)                                                                                                                                                                                                                                                                                                                                  |
| <b>Grade IVb</b>  | Multiorgan dysfunction                                                                                                                                                                                                                                                                                                                                                         |
| <b>Grade V</b>    | Death of a patient                                                                                                                                                                                                                                                                                                                                                             |

\*brain hemorrhage, ischemic stroke, subarachnoid bleeding, but excluding transient ischemic attacks; IC intermediate care; ICU intensive care unit.
